# Supplementary material for: Ischemic Lesion Location Based on the ASPECT Score for Risk Assessment of Neurogenic Dysphagia
Source: Springer Nature journal article supplement (doi:10.1007/s00455-020-10204-0), 2020-11-06
Supplement: MOESM1 [file 455_2020_10204_MOESM1_ESM.pdf]

Article title: Ischemic lesion location based on the ASPECT score for risk assessment of neurogenic dysphagia; Journal: Dysphagia; Authors: Sriramya Lapa, Christian Foerch, Oliver C. Singer, Elke Hattingen and Sebastian Luger; affiliation/e-mail address of corr. author: Department of Neurology, Goethe University, Frankfurt am Main, Germany; Sebastian.Luger@kgu.de

**Suppl. Table 1a**

**Frequency of dysphagic patients (n = dysphagic / total ) with respect to the affected ischemic “hot spots” for each ASPECT score (10 – 0)**

| <b>ASPECTS</b> | <b>LN affected, n =<br/>dysphagic / total</b> | <b>LN not affected, n =<br/>dysphagic / total</b> | <b>In affected, n =<br/>dysphagic total</b> | <b>In not affected, n =<br/>dysphagic / total</b> | <b>M1 affected, n =<br/>dysphagic / total</b> | <b>M1 not affected, n =<br/>dysphagic / total</b> |
|----------------|-----------------------------------------------|---------------------------------------------------|---------------------------------------------|---------------------------------------------------|-----------------------------------------------|---------------------------------------------------|
| <b>10</b>      |                                               |                                                   |                                             |                                                   |                                               |                                                   |
| <b>9</b>       | 3 / 4                                         | 4 / 16                                            | x                                           | 7 / 20                                            | x                                             | 7 / 20                                            |
| <b>8</b>       | 3 / 5                                         | 6 / 12                                            | 6 / 9                                       | 3 / 8                                             | 3 / 5                                         | 6 / 12                                            |
| <b>7</b>       | 4 / 4                                         | 10 / 15                                           | 7 / 10                                      | 7 / 9                                             | 3 / 4                                         | 11 / 15                                           |
| <b>6</b>       | 1 / 1                                         | 7 / 11                                            | 6 / 9                                       | 2 / 3                                             | 5 / 8                                         | 3 / 4                                             |
| <b>5</b>       | 3 / 5                                         | 2 / 4                                             | 5 / 9                                       | x                                                 | 4 / 6                                         | 1 / 3                                             |
| <b>4</b>       | 4 / 6                                         | 0 / 1                                             | 4 / 6                                       | 0 / 1                                             | 3 / 5                                         | 1 / 2                                             |
| <b>3</b>       | 3 / 3                                         | 3 / 4                                             | 6 / 7                                       | x                                                 | 5 / 6                                         | 1 / 1                                             |
| <b>2</b>       | 2 / 3                                         | x                                                 | 2 / 3                                       | x                                                 | 1 / 2                                         | 1 / 1                                             |
| <b>1</b>       | 1 / 1                                         | x                                                 | 1 / 1                                       | x                                                 | 1 / 1                                         | x                                                 |
| <b>0</b>       | 1 / 1                                         | x                                                 | 1 / 1                                       | x                                                 | 1 / 1                                         | x                                                 |

ASPECTS indicates Alberta Stroke Program Early CT Score; LN, lentiform nucleus; In, Insula; frontal operculum, M1. For cells marked with x there is no data available that meets the criteria.

**Suppl. Table 1b**

**Frequency of dysphagic patients (%) with respect to the affected ischemic “hot spots” for each ASPECT score (10 – 0)**

| ASPECTS | LN affected, dysphagic in % | LN <b>not</b> affected, dysphagic in % | In affected, dysphagic in % | In <b>not</b> affected, dysphagic in % | M1 affected, dysphagic in % | M1 <b>not</b> affected, dysphagic in % |
|---------|-----------------------------|----------------------------------------|-----------------------------|----------------------------------------|-----------------------------|----------------------------------------|
| 10      |                             |                                        |                             |                                        |                             |                                        |
| 9       | 75%                         | 25%                                    |                             | 35%                                    |                             | 35%                                    |
| 8       | 60%                         | 50%                                    | 67%                         | 38%                                    | 60%                         | 50%                                    |
| 7       | 100%                        | 67%                                    | 70%                         | 78%                                    | 75%                         | 73%                                    |
| 6       | 100%                        | 64%                                    | 67%                         | 67%                                    | 63%                         | 75%                                    |
| 5       | 60%                         | 50%                                    | 56%                         |                                        | 67%                         | 33%                                    |
| 4       | 67%                         | 0%                                     | 67%                         | 0%                                     | 60%                         | 50%                                    |
| 3       | 100%                        | 75%                                    | 86%                         |                                        | 83%                         | 100%                                   |
| 2       | 67%                         |                                        | 67%                         |                                        | 50%                         | 100%                                   |
| 1       | 100%                        |                                        | 100%                        |                                        | 100%                        |                                        |
| 0       | 100%                        |                                        | 100%                        |                                        | 100%                        |                                        |

ASPECTS indicates Alberta Stroke Program Early CT Score; LN, lentiform nucleus; In, Insula; frontal operculum, M1. On a continuous color scale dark green color indicates low frequency and dark red color indicates high frequency of dysphagia. For gray-shaded cells there is no data available that meets the criteria.
